# Supplementary material for: Next-generation profiling to identify the molecular etiology of Parkinson dementia
Source: PubMed Central journal article supplement — Neurol Genet. 2016 May 24;2(3):e75. doi: 10.1212/NXG.0000000000000075 (PMC4881621; doi:10.1212/nxg.0000000000000075), 2016-05-24
Supplement: supp_2.3.e75_e-Tables.pdf [file supp_2.3.e75_e-Tables.pdf]

688

## SUPPLEMENTAL TABLES

689

690 Table e-1. Top 20 differentially expressed genes by disease group.

| A. PDD vs. PD Overexpressed |                        |             | B. PDD vs. PD Underexpressed |                        |             |
|-----------------------------|------------------------|-------------|------------------------------|------------------------|-------------|
| Gene                        | P-value                | Fold Change | Gene                         | P-value                | Fold Change |
| IGKV1-5                     | $1.49 \times 10^{-5}$  | 122.11      | OR4N2                        | $4.32 \times 10^{-5}$  | -25.85      |
| CXCL9                       | $9.82 \times 10^{-34}$ | 77.64       | UBD                          | $1.98 \times 10^{-6}$  | -19.62      |
| IGHG1                       | $3.69 \times 10^{-17}$ | 14.20       | OTX2                         | $3.84 \times 10^{-6}$  | -18.80      |
| IGHG3                       | $8.08 \times 10^{-6}$  | 12.80       | LMX1A                        | $4.51 \times 10^{-6}$  | -17.45      |
| IGHG2                       | $1.33 \times 10^{-9}$  | 10.25       | CCL4                         | $1.65 \times 10^{-9}$  | -12.48      |
| IGHM                        | $4.43 \times 10^{-6}$  | 8.24        | C6                           | $1.11 \times 10^{-11}$ | -10.02      |
| IGHG4                       | $7.30 \times 10^{-7}$  | 8.08        | S100A14                      | $6.77 \times 10^{-9}$  | -8.15       |
| MTRNR2L8                    | $2.45 \times 10^{-9}$  | 7.71        | LTF                          | $2.43 \times 10^{-16}$ | -7.99       |
| RAX2                        | $1.01 \times 10^{-6}$  | 7.40        | HTR2B                        | $1.78 \times 10^{-5}$  | -7.39       |
| PSPN                        | $1.95 \times 10^{-5}$  | 7.07        | FAM216B                      | $9.59 \times 10^{-12}$ | -7.33       |
| NPC1L1                      | $7.74 \times 10^{-12}$ | 6.35        | IL1RN                        | $4.30 \times 10^{-7}$  | -6.74       |
| SELE                        | $1.07 \times 10^{-6}$  | 5.27        | MYO1A                        | $8.57 \times 10^{-11}$ | -6.51       |
| NANOS2                      | $3.84 \times 10^{-6}$  | 5.18        | ADGB                         | $1.01 \times 10^{-6}$  | -6.30       |
| CSF3                        | $1.01 \times 10^{-5}$  | 4.99        | PZP                          | $2.72 \times 10^{-10}$ | -6.17       |
| IL8                         | $1.57 \times 10^{-6}$  | 4.69        | NTS                          | $5.25 \times 10^{-8}$  | -6.12       |
| GRB7                        | $1.26 \times 10^{-6}$  | 3.96        | FAM183A                      | $9.51 \times 10^{-5}$  | -6.10       |
| CNTD2                       | $4.51 \times 10^{-6}$  | 3.60        | CDHR4                        | $2.57 \times 10^{-4}$  | -5.79       |
| HSPA6                       | $9.81 \times 10^{-7}$  | 3.58        | CCL3                         | $9.73 \times 10^{-7}$  | -5.68       |
| HSD11B2                     | $1.01 \times 10^{-6}$  | 3.47        | CCDC19                       | $6.73 \times 10^{-7}$  | -4.95       |
| HIST2H3C                    | $1.38 \times 10^{-5}$  | 3.15        | NPY2R                        | $1.01 \times 10^{-6}$  | -4.92       |

691

692 PDD overexpressed genes, relative to PD (A) and PDD underexpressed genes, relative

693 to PD (B) ( $p \leq 0.001$ ,  $fc \geq |0.2|$ ).

694

695

696

697

698

699

700

701

702

703

704 **Table e-2. Network functions from input of top 20 genes lists (disease vs. controls).**

705

**A. PD Overexpressed**

| <b>GO Function</b>                                                     | <b>FDR</b>            | <b>Network Genes</b> | <b>Genome Genes</b> |
|------------------------------------------------------------------------|-----------------------|----------------------|---------------------|
| cell chemotaxis                                                        | $5.22 \times 10^{-7}$ | 9                    | 157                 |
| cytokine receptor binding                                              | $5.60 \times 10^{-6}$ | 8                    | 147                 |
| positive regulation of cAMP-mediated signaling                         | $2.74 \times 10^{-5}$ | 4                    | 11                  |
| chemokine receptor binding                                             | $2.74 \times 10^{-5}$ | 5                    | 32                  |
| positive regulation of homeostatic process                             | $1.04 \times 10^{-4}$ | 5                    | 46                  |
| regulation of cAMP-mediated signaling                                  | $1.04 \times 10^{-4}$ | 4                    | 17                  |
| positive regulation of release of sequestered calcium ion into cytosol | $1.04 \times 10^{-4}$ | 4                    | 17                  |
| metal ion homeostasis                                                  | $2.72 \times 10^{-4}$ | 8                    | 288                 |
| positive regulation of intracellular transport                         | $3.87 \times 10^{-4}$ | 6                    | 122                 |
| positive regulation of calcium ion transport into cytosol              | $4.40 \times 10^{-4}$ | 4                    | 26                  |

**B. PD Underexpressed**

| <b>GO Function</b>            | <b>FDR</b>            | <b>Network Genes</b> | <b>Genome Genes</b> |
|-------------------------------|-----------------------|----------------------|---------------------|
| neuropeptide hormone activity | $6.57 \times 10^{-2}$ | 3                    | 15                  |
| hormone activity              | $9.19 \times 10^{-1}$ | 3                    | 44                  |

**C. PD-D Overexpressed**

| <b>GO Function</b>                          | <b>FDR</b>             | <b>Network Genes</b> | <b>Genome Genes</b> |
|---------------------------------------------|------------------------|----------------------|---------------------|
| response to unfolded protein                | $3.66 \times 10^{-18}$ | 14                   | 106                 |
| response to topologically incorrect protein | $4.71 \times 10^{-18}$ | 14                   | 113                 |
| protein folding                             | $3.81 \times 10^{-5}$  | 7                    | 124                 |
| cell chemotaxis                             | $2.57 \times 10^{-3}$  | 6                    | 157                 |
| COP9 signalosome                            | $2.57 \times 10^{-3}$  | 4                    | 34                  |
| cytokine receptor binding                   | $2.57 \times 10^{-3}$  | 6                    | 147                 |
| leukocyte chemotaxis                        | $6.76 \times 10^{-3}$  | 5                    | 106                 |
| blood microparticle                         | $6.76 \times 10^{-3}$  | 5                    | 108                 |
| unfolded protein binding                    | $8.52 \times 10^{-3}$  | 4                    | 52                  |
| defense response to Gram-negative bacterium | $8.73 \times 10^{-3}$  | 3                    | 16                  |

**D. PD-D Underexpressed**

| <b>GO Function</b>                  | <b>FDR</b>            | <b>Network Genes</b> | <b>Genome Genes</b> |
|-------------------------------------|-----------------------|----------------------|---------------------|
| neuropeptide hormone activity       | $3.04 \times 10^{-2}$ | 3                    | 15                  |
| hormone activity                    | $3.04 \times 10^{-2}$ | 4                    | 44                  |
| calcium-mediated signaling          | $7.66 \times 10^{-2}$ | 4                    | 72                  |
| bicarbonate transport               | $1.20 \times 10^{-1}$ | 3                    | 29                  |
| regulation of system process        | $1.78 \times 10^{-1}$ | 5                    | 203                 |
| blood microparticle                 | $1.90 \times 10^{-1}$ | 4                    | 108                 |
| second-messenger-mediated signaling | $2.78 \times 10^{-1}$ | 4                    | 124                 |
| gas transport                       | $4.05 \times 10^{-1}$ | 2                    | 10                  |
| hydrogen peroxide catabolic process | $4.08 \times 10^{-1}$ | 2                    | 14                  |
| cellular ion homeostasis            | $4.08 \times 10^{-1}$ | 5                    | 292                 |

706

707 GeneMANIA measures significance by false discovery rate (FDR). Numbers of genes  
708 involved in a particular cellular function are shown, both within the resulting network and from  
709 the entire genome. The first 10 functions (of 87) are listed from overexpressed PD genes, and  
710 the first 10 (of 56) from overexpressed PD-D genes (A,C). All functions from underexpressed  
711 genes are shown (B,D).

712

713

714

715

716

717

718

719

720

721

722

723

724

725

726

727

728

729

730

731

732

733

734

735

736

737

738 **Table e-3. SpliceSeq-predicted Event Statistics for Genes to be Validated by qRT-PCR**

| <b>PD-D</b>          |                       |             |                  |                   |                           |                            |
|----------------------|-----------------------|-------------|------------------|-------------------|---------------------------|----------------------------|
| <b>Gene (exon #)</b> | <b>P-Value</b>        | <b>dPSI</b> | <b>Magnitude</b> | <b>% Observed</b> | <b>RPKM<sub>CON</sub></b> | <b>RPKM<sub>PD-D</sub></b> |
| ATXN2 (21)           | $7.81 \times 10^{-3}$ | -0.231      | 1.000            | 100%              | 15.9                      | 14.0                       |
| DST (104)            | $3.21 \times 10^{-3}$ | -0.255      | 1.000            | 100%              | 81.4                      | 85.6                       |
| HSPH1 (13)           | $9.50 \times 10^{-3}$ | -0.231      | 0.962            | 100%              | 48.8                      | 99.6                       |
| RELA (10.2)          | $5.09 \times 10^{-4}$ | 0.286       | 0.978            | 100%              | 16.1                      | 24.9                       |
| SRRM1 (16)           | $4.95 \times 10^{-3}$ | -0.250      | 0.994            | 100%              | 34.2                      | 25.6                       |
| <b>PD</b>            |                       |             |                  |                   |                           |                            |
| <b>Gene (exon #)</b> | <b>P-Value</b>        | <b>dPSI</b> | <b>Magnitude</b> | <b>% Observed</b> | <b>RPKM<sub>CON</sub></b> | <b>RPKM<sub>PD</sub></b>   |
| LRRFIP1 (18-19)      | $8.76 \times 10^{-3}$ | -0.257      | 1.000            | 100%              | 12.5                      | 8.7                        |
| TRIM9 (8-10)         | $1.83 \times 10^{-3}$ | -0.264      | 0.932            | 100%              | 22.9                      | 22.6                       |

739

740 Top alternatively spliced genes obtained by filtering for  $p < 0.01$ ,  $dPSI > |0.2|$ , magnitude and741 % observed  $> |0.8|$  ( $1.0 = 100\%$ ). The resulting lists contained 40 PD-D genes and 10 PD

742 genes. Finally, genes with the highest RPKM values were chosen for validation by qRT-PCR.

743

744

745

746

747

748

749

750

751

752

753

754

755

756

757

758

759

760

761

762 **Table e-4. qRT-PCR fold change values**

| <b>PD-D</b> |                        |                        |
|-------------|------------------------|------------------------|
| <b>Gene</b> | <b>FC<sub>as</sub></b> | <b>FC<sub>ns</sub></b> |
| ATXN2       | 0.674                  | 2.201                  |
| DST         | 1.160                  | 1.171                  |
| HSPH1       | 0.952                  | 1.924                  |
| RELA        | 3.467                  | 1.323                  |
| SRRM1       | 0.598                  | 0.780                  |

| <b>PD</b>   |                        |                        |
|-------------|------------------------|------------------------|
| <b>Gene</b> | <b>FC<sub>as</sub></b> | <b>FC<sub>ns</sub></b> |
| LRRFIP1     | 0.821                  | 1.352                  |
| TRIM9       | 0.930                  | 1.431                  |

763

764 Fold change values ( $2^{-\Delta\Delta C_t}$ ) for predicted alternative splice sites (FC<sub>as</sub>) and adjacent sites765 lacking any predicted splicing activity, "no-splice" (FC<sub>ns</sub>).

766

767

768
